# Supplementary material for: Improving the kinetics and surface stability of sodium manganese oxide cathode materials for sodium rechargeable batteries with Al2O3/MWCNT hybrid networks
Source: Royal Society of Chemistry journal article supplement (doi:10.1039/c5ta00609k), 2015-01-01
Supplement: c5ta00609k1.pdf [file c5ta00609k1.pdf]

## Electronic supplementary information

### Improving Kinetics and Surface Stability of Sodium Manganese Oxide Cathode Materials for Sodium Rechargeable Batteries with Al<sub>2</sub>O<sub>3</sub>/MWCNT Hybrid Networks

Jun-Ho Park,<sup>a</sup> Kwang-Jin Park,<sup>a</sup> Ryoung-Hee Kim,<sup>a</sup> Dong-Jin Yun,<sup>b</sup> Seong-Yong Park,<sup>b</sup> Dong-Wook Han,<sup>\*a</sup> Seok-Soo Lee,<sup>a</sup> and Jin-Hwan Park<sup>a</sup>

<sup>a</sup> Energy Lab, Samsung Advanced Institute of Technology, Suwon, 440-600, Republic of Korea. E-mail: [dongwook.han@samsung.com](mailto:dongwook.han@samsung.com)

<sup>b</sup> Analytical Science Laboratory, Samsung Advanced Institute of Technology, Suwon, 440-600, Republic of Korea

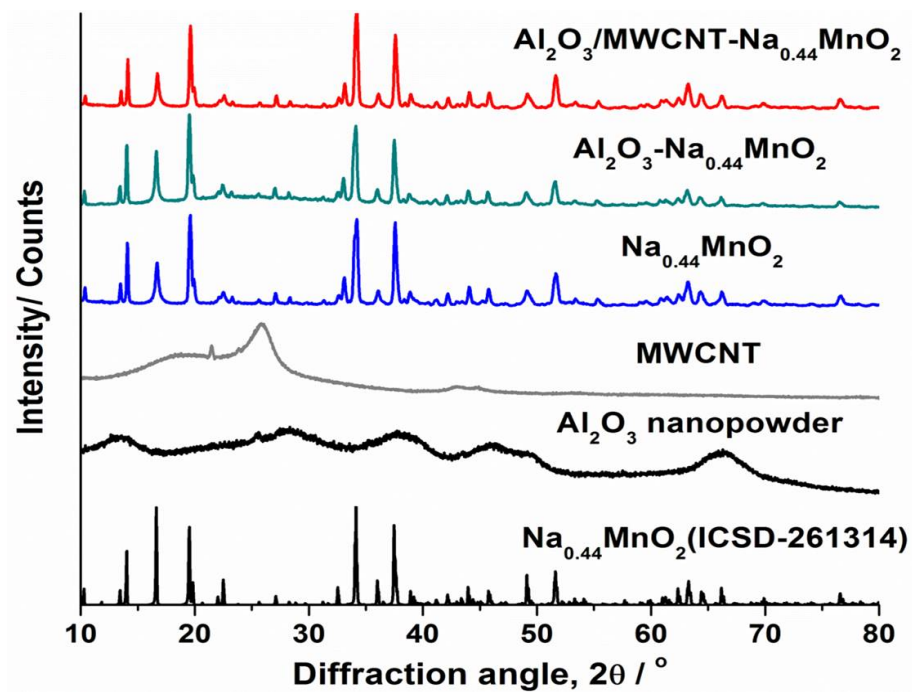

Fig. S1 X-ray diffraction (XRD) patterns acquired from pristine and surface-modified Na<sub>0.44</sub>MnO<sub>2</sub>.

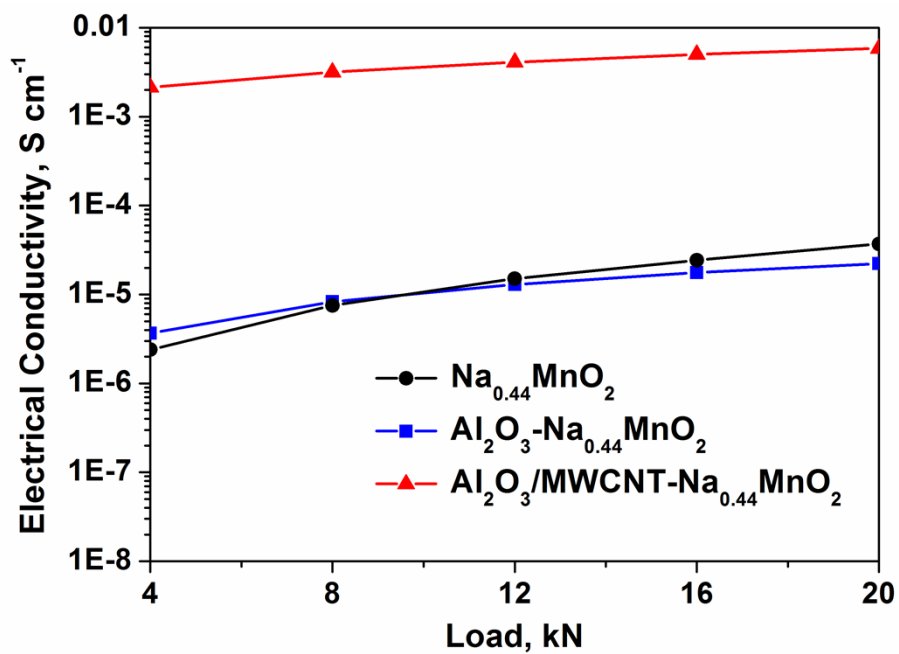

Fig. S2 Electrical conductivities of pristine and surface-modified  $\text{Na}_{0.44}\text{MnO}_2$  measured by a four-point probe powder resistivity measurement system.

| Compounds                                                  | ICT-AES [%wt] |      |      | Na/Mn [%at/at] | Al/Mn [%at/at] | Carbon cont. [%wt] |
|------------------------------------------------------------|---------------|------|------|----------------|----------------|--------------------|
|                                                            | Na            | Mn   | Al   |                |                |                    |
| $\text{Na}_{0.44}\text{MnO}_2$                             | 10.7          | 56.2 | -    | 0.455          | -              | 0.23               |
| $\text{Al}_2\text{O}_3\text{-Na}_{0.44}\text{MnO}_2$       | 11.0          | 56.5 | 0.19 | 0.465          | 0.007          | 0.23               |
| $\text{Al}_2\text{O}_3/\text{MWCNT-Na}_{0.44}\text{MnO}_2$ | 10.7          | 55.8 | 0.21 | 0.458          | 0.008          | 1.04               |

**Table S1** Results of the inductively coupled plasma atomic emission spectroscopy (ICP-AES) and elemental analyses (EA) of pristine and surface-modified  $\text{Na}_{0.44}\text{MnO}_2$ .
